# Supplementary material for: Suppression of Arabidopsis GGLT1 affects growth by reducing the L‐galactose content and borate cross‐linking of rhamnogalacturonan‐II
Source: PubMed Central journal article supplement — Plant J. 2018 Oct 20;96(5):1036–50. doi: 10.1111/tpj.14088 (PMC6263843; doi:10.1111/tpj.14088), 2018-10-20
Supplement: NIHMS988806-supplement-Supp_figS1-8.pdf [file NIHMS988806-supplement-Supp_figS1-8.pdf]

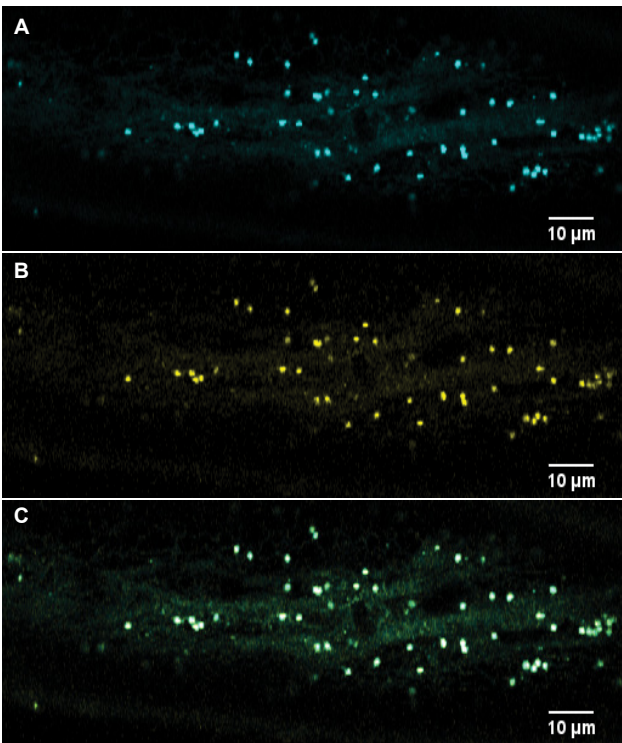

**Supplemental Figure S1: Subcellular localization of GGLT1.** A Golgi marker,  $\alpha$ -mannosidase, fused to CFP (A) and GGLT1 fused to YFP (B) were expressed in onion epidermal cells. An overlay is shown in (C).

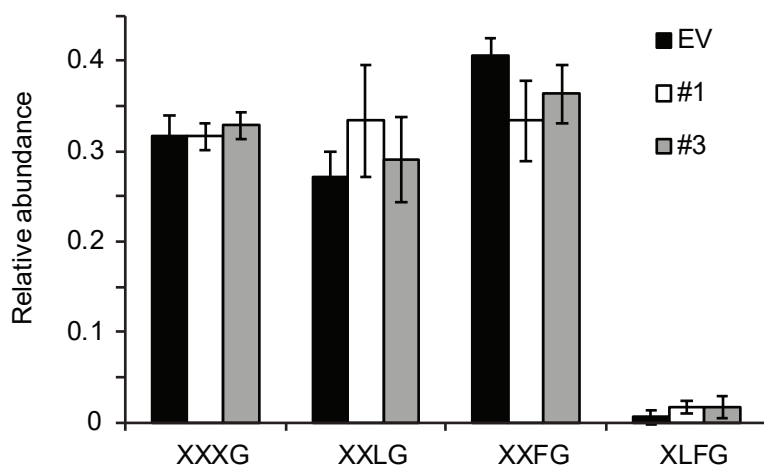

**Supplemental Figure S2 : Xyloglucan composition is not affected in *hpGGLT1* lines.** MALDI-TOF analysis of xyloglucan from the etiolated hypocotyls of EV (black bars), *hpGGLT1* #1 (white bars), and *hpGGLT* #3 (gray bars). Minor subunits (<5% relative abundance) are not shown. Standard xyloglucan nomenclature has been used to describe the oligosaccharides where X = backbone glucose substituted with a terminal xylose, L = substituted with  $\beta$ -D-galactose, F = substituted with fucose, and G = unsubstituted. Mean values represent acetylated and nonacetylated subunits of XXLG, XXFG, and XLFG combined. Data represent the mean of 4 biological replicates, error bars represent the standard deviation. No statistical significance (Student's *t*-test,  $P < 0.05$ ) was observed between EV and *hpGGLT1*.

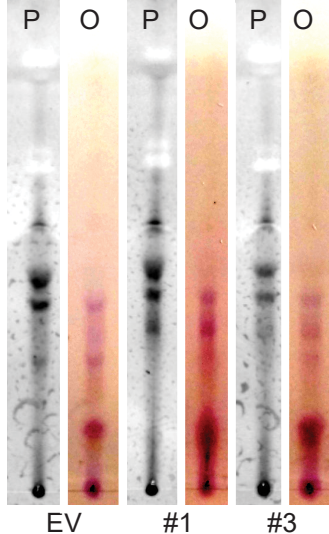

**Supplemental Figure S3** : Thin layer chromatography of GIPCs extracted from the leaves of control (EV) and *hpGGLT1* (lines #1 and #3) plants. After development, plates were first stained with Orcinol solution (O) then with Primuline solution (P).

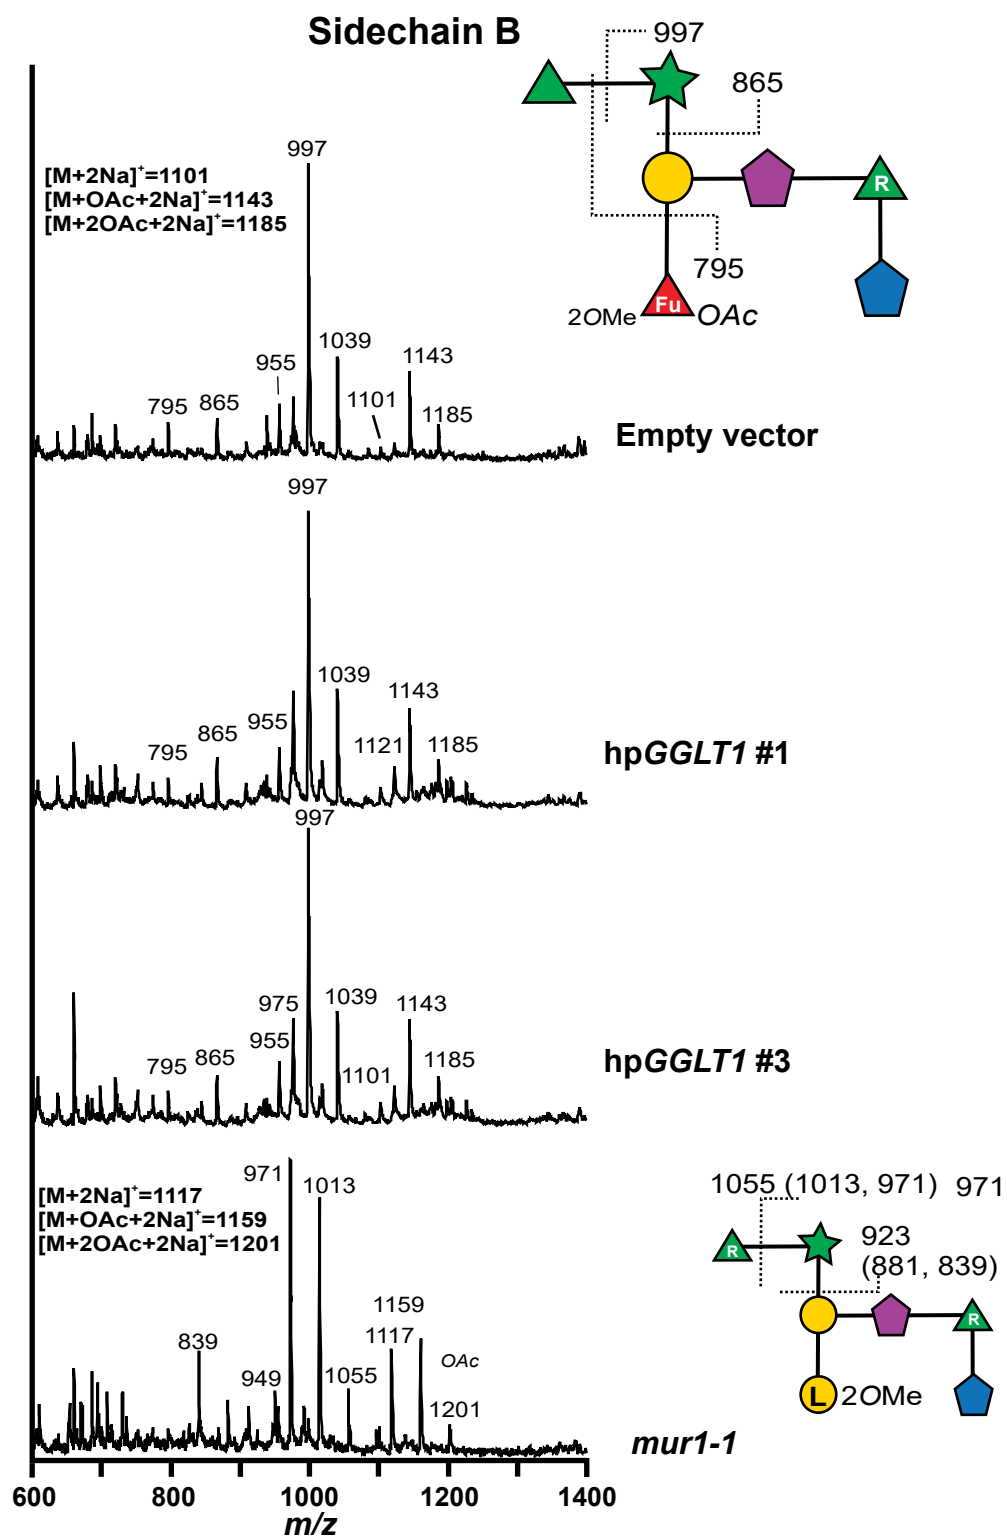

**Supplemental Figure S4: MALDI analysis of RG-II side-chain B.** The positive ion MALDI-TOF mass spectrum of side-chain B generated by selective acid hydrolysis of RG-II. No discernible differences were detected in side-chain B generated from the empty vector and hpGGLT1 RG-II. The oligosaccharide structures are represented using a modified SNFG nomenclature. See Figure 1 for details.

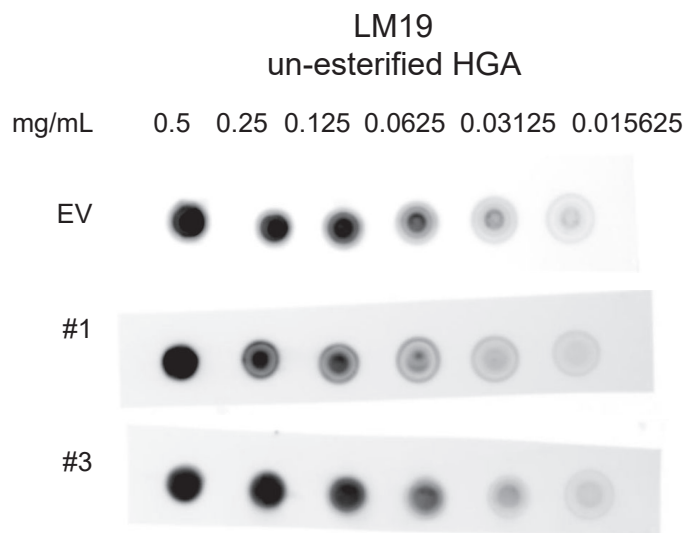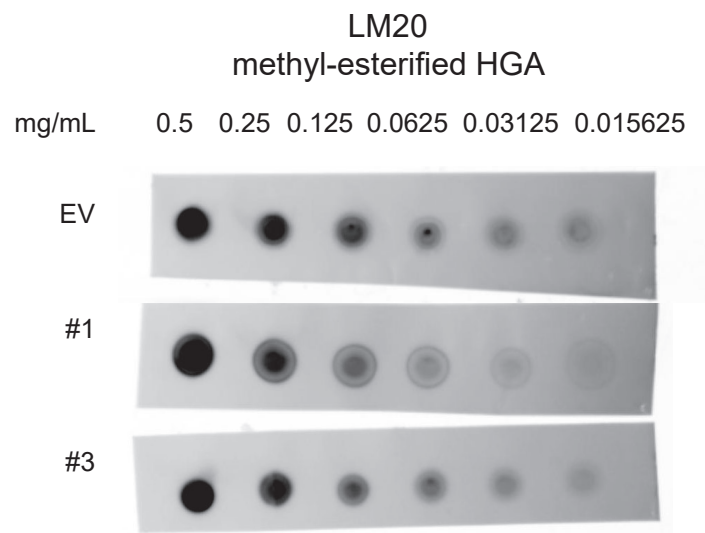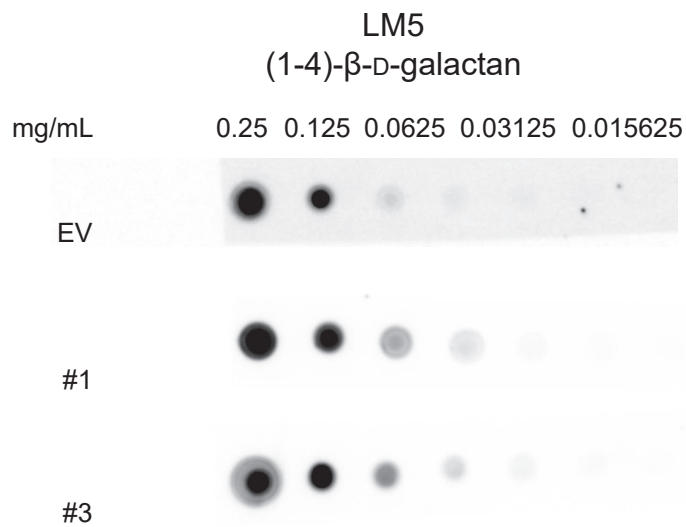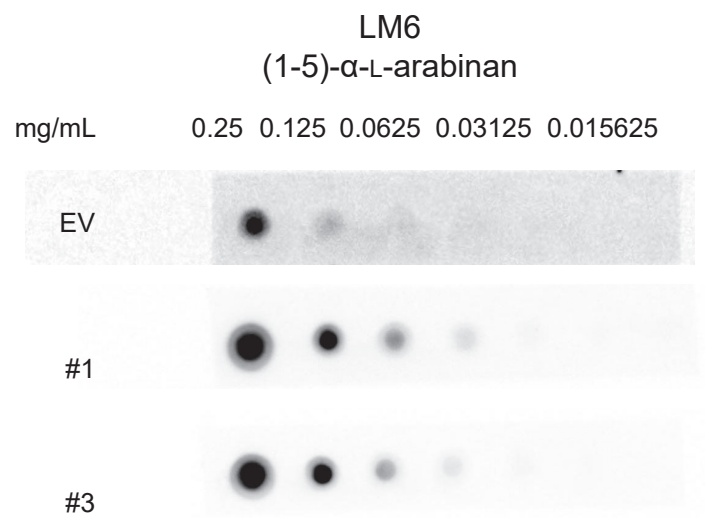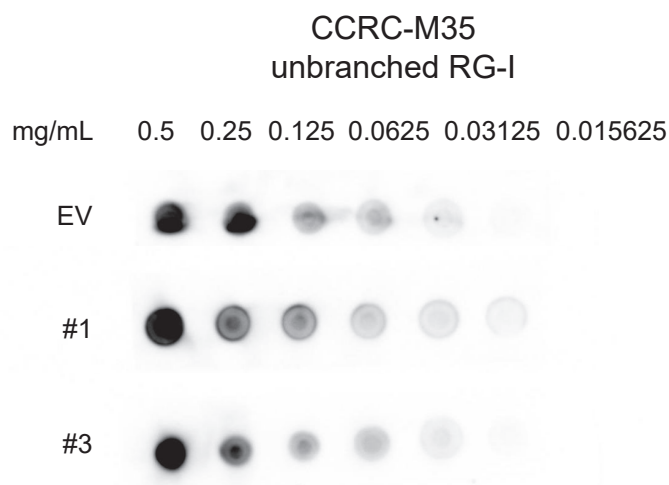

**Supplemental Figure S5: Immuno-dot blot of oxalate fraction shows unchanged bulk pectin.** The oxalate extracted fraction was resuspended in water, serially diluted and an immuno dot-blot performed.

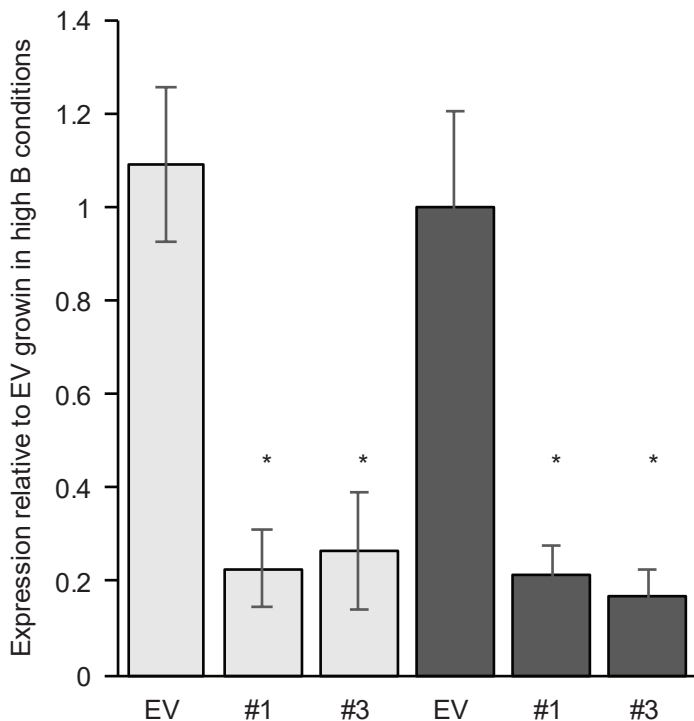

**Supplemental Figure S6: GGLT1 silencing is not dependent on B concentration.** Expression was determined on plants grown hydroponically in low B (light grey) or high B (dark grey). Data represent the mean of 3 technical replicates using 2 reference genes, error bars represent the standard deviation. Asterisks indicate significantly different from EV (Student's *t*-test, \*  $P < 0.05$ ).

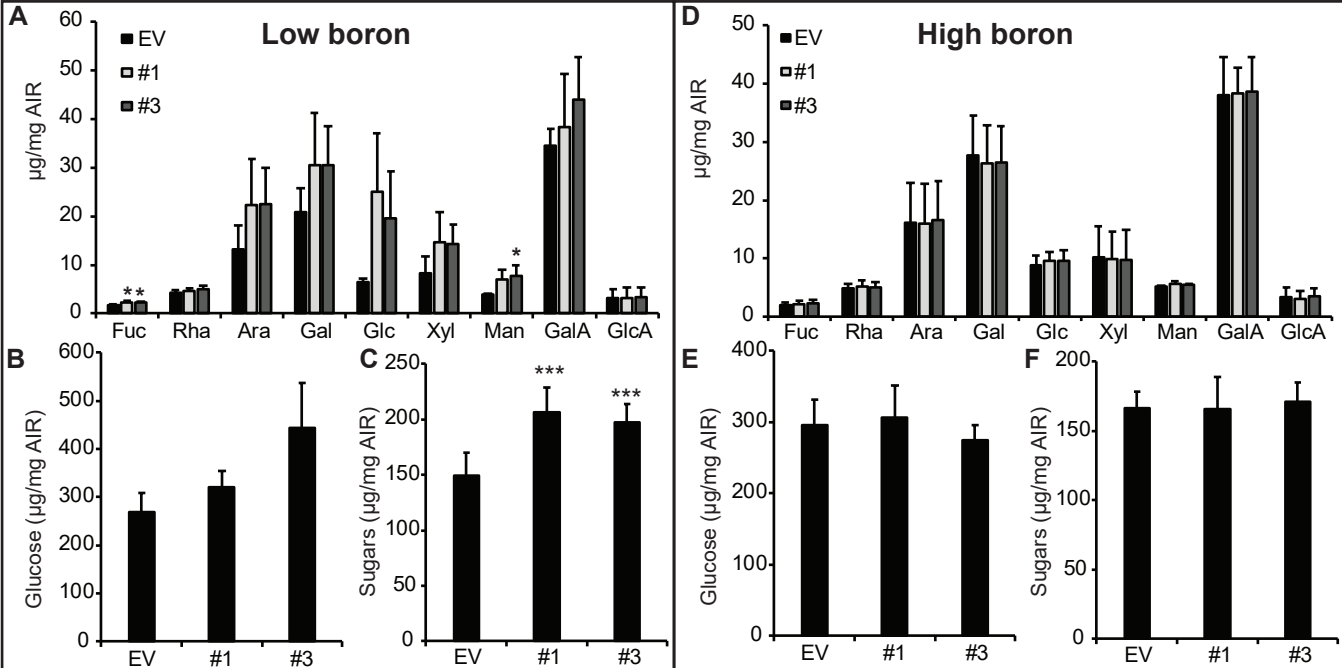

**Supplementary Figure S7: Cell wall composition is altered in boron deficient conditions.** (A, D) Monosaccharide composition after TFA hydrolysis, (B, E) Glucose from crystalline cellulose (Saeman hydrolysis) and (C, F) sugar released from 72h saccharification treatment with cellulase cocktail of *hpGGLT1* lines compared to control plants carrying the empty vector (EV) in low concentration or high concentration of boron. The data in (A, D) represents the mean of 4 plants  $\pm$  SD; (B, E) and (C, F) represents the mean of 6-12 plants  $\pm$  SEM. Asterisks indicate a significant difference from EV (Student's *t*-test, \*  $P < 0.05$ , \*\*  $P < 0.01$ , \*\*\*  $P < 0.001$ ).

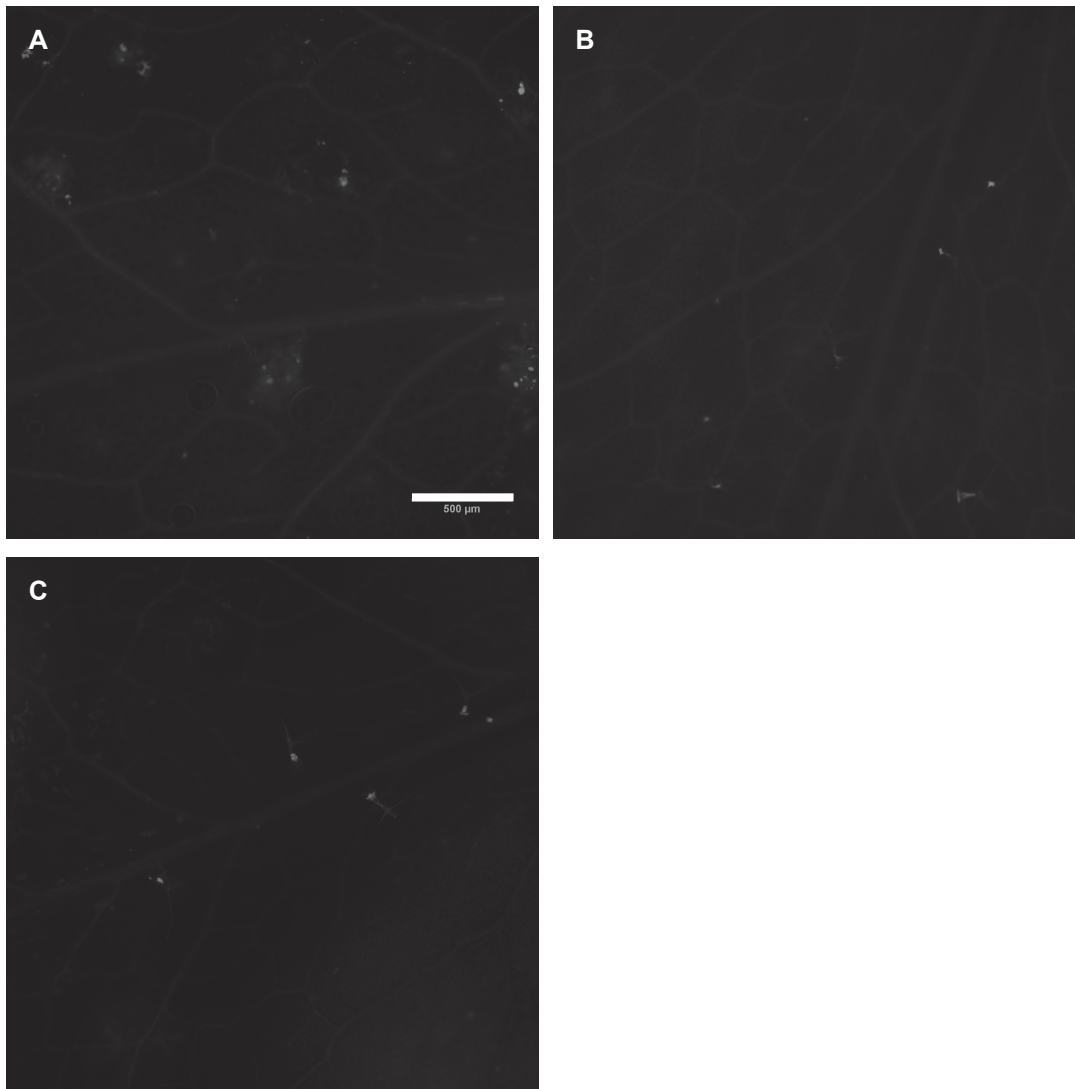

**Supplemental Figure S8: Aniline blue staining for callose deposition in hpGGLT1 leaves.** Leaves were destained in ethanol, and then stained with aniline blue. Leaves were observed using a confocal microscope at the same magnification. Scale bar = 500  $\mu\text{m}$ . Visible aniline blue staining indicates damaged trichomes on the leaf surface. (A) EV control (B) line #4 and (C) line #1. Representative images are shown. 3 leaves were inspected for each line.
