# Supplementary material for: Suppression of Arabidopsis GGLT1 affects growth by reducing the L‐galactose content and borate cross‐linking of rhamnogalacturonan‐II
Source: PubMed Central journal article supplement — Plant J. 2018 Oct 20;96(5):1036–50. doi: 10.1111/tpj.14088 (PMC6263843; doi:10.1111/tpj.14088), 2018-10-20
Supplement: NIHMS988806-supplement-Supp_TableS1-2.pdf [file NIHMS988806-supplement-Supp_TableS1-2.pdf]

**Supplemental Table S1: The abundance of the RG-II dimer and monomer in the material released by EPG- treatment of the AIR and by EPG treatment of the ammonium oxalate soluble pectin.**

| Plant        | Released by EPG treatment of AIR |         | EPG-treated oxalate fraction |         |
|--------------|----------------------------------|---------|------------------------------|---------|
|              | Dimer                            | monomer | Dimer                        | monomer |
|              | % of total RG-II <sup>a</sup>    |         |                              |         |
| Empty vector | 97                               | 3       | 77                           | 23      |
| hpGGLT1 #1   | 88                               | 12      | 48                           | 52      |
| hpGGLT1 #3   | 89                               | 11      | 49                           | 51      |
| mur1-1       | 70                               | 30      | 6                            | 94      |

<sup>a</sup>the abundance of the dimer and monomer was determined by SEC with RI detection.

**Supplemental Table S2: Sequences of the oligonucleotide primers used in this manuscript. 5'-3'. GFT1 primers were previously described in (Rautengarten *et al.*, 2016).**

| AGI       | Gene name | Forward primer (5'-3')                                     | Reverse primer (5'-3')                                   |
|-----------|-----------|------------------------------------------------------------|----------------------------------------------------------|
| At1g76340 | GGLT1     | GGAAACGCTTTTCTTGCAT<br>C                                   | ACGCAAGAGCCCAGC<br>TATAA                                 |
| At5g19980 | GFT1      | GCGTCAACTCCTCATCTTC<br>C                                   | TAAGCATGCCACTCCTGTTG                                     |
| At1g13320 | PPA2      | TAACGTGGCCAAAATGATG<br>C                                   | GTTCTCCACAACCGCTTGGT                                     |
| At2g28390 | SAND      | AACTCTATGCAGCATTGA<br>TCCACT                               | TGATTGCATATCTTTATCGCC<br>ATC                             |
| GGLT RNAi | GGLT1     | GGGGACAAGTTTGTACAAA<br>AAAGCAGGCTGTTCCAGAA<br>CCAAGCCCAGAG | GGGGACCACTTTGTACAAGA<br>AAGCTGGGTGCGTTTCCCAA<br>TGGCAACG |
